# Supplementary material for: Sex-Specific Effects of Long-Term Antipsychotic Drug Treatment on Adipocyte Tissue and the Crosstalk to Liver and Brain in Rats
Source: MDPI journal article supplement (doi:10.3390/ijms25042188), 2024-02-11
Supplement: s1 [file s1]

## Supplement

### Figure S1

a. Chemiluminescence detection of the membranes incubated with the primary antibodies against PerilipinA, HSL, hepcidin, Glut4 and IR $\beta$  and the respective secondary antibodies, (HRP-conjugated).

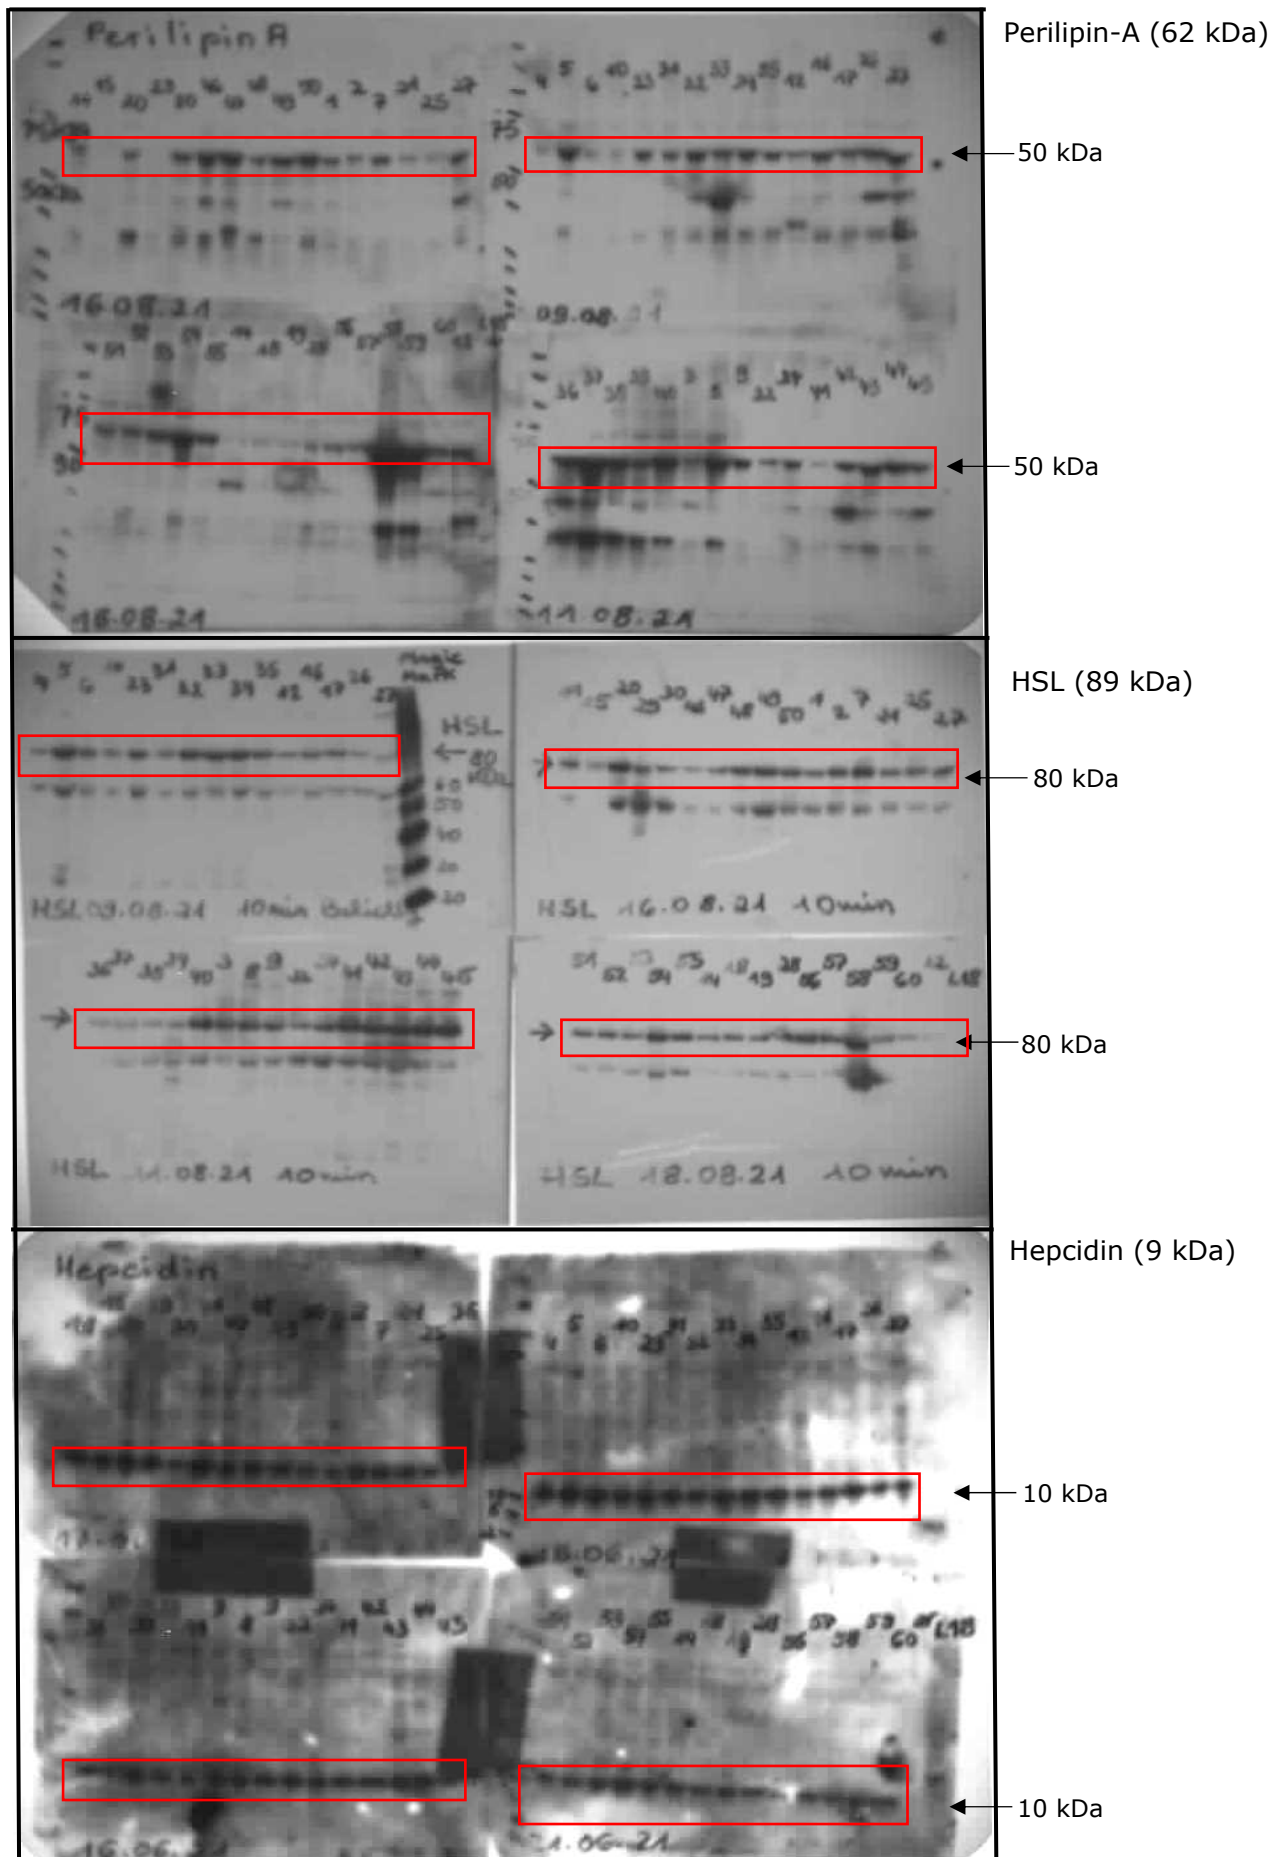

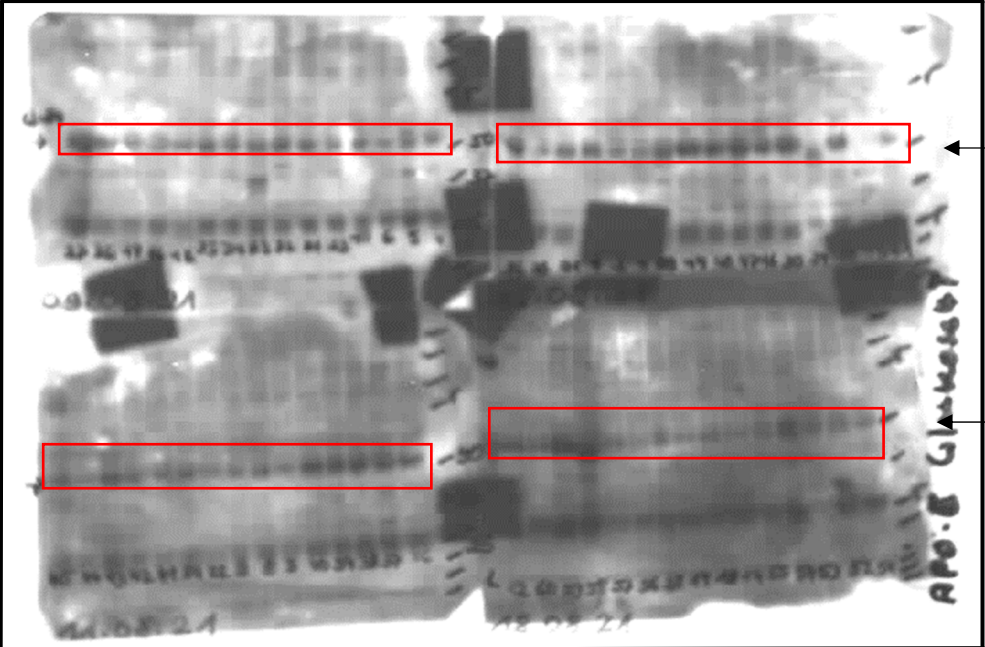

Glut-4 (54 kDa)

50 kDa

50 kDa

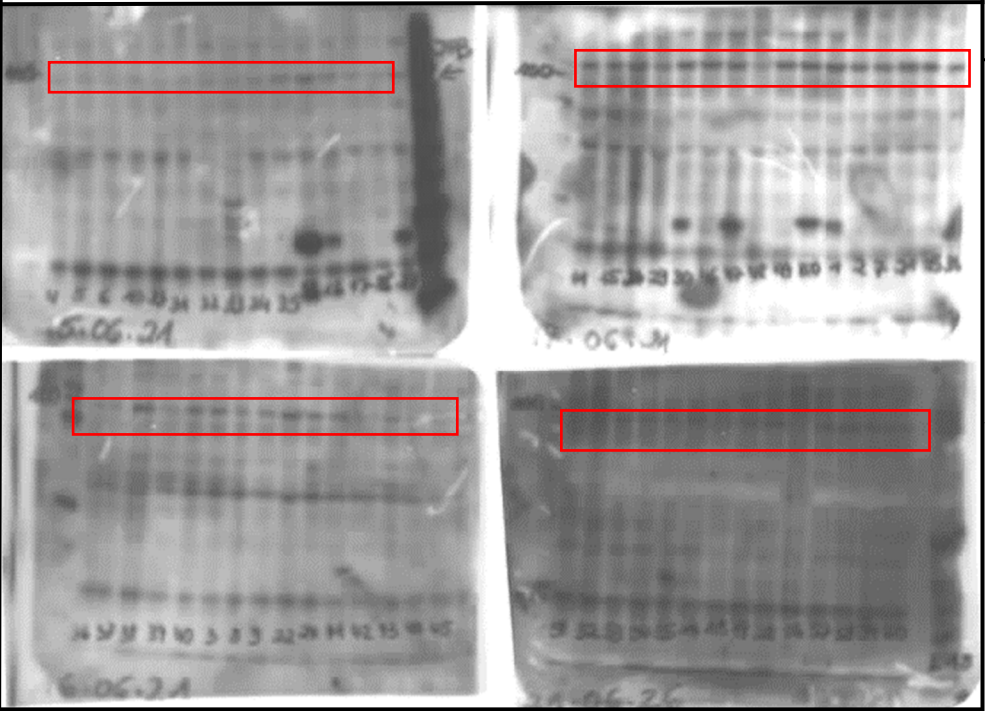

IR-β (95 kDa)

100 kDa

100 kDa

b. Westernblot membranes stained with Ponceau red

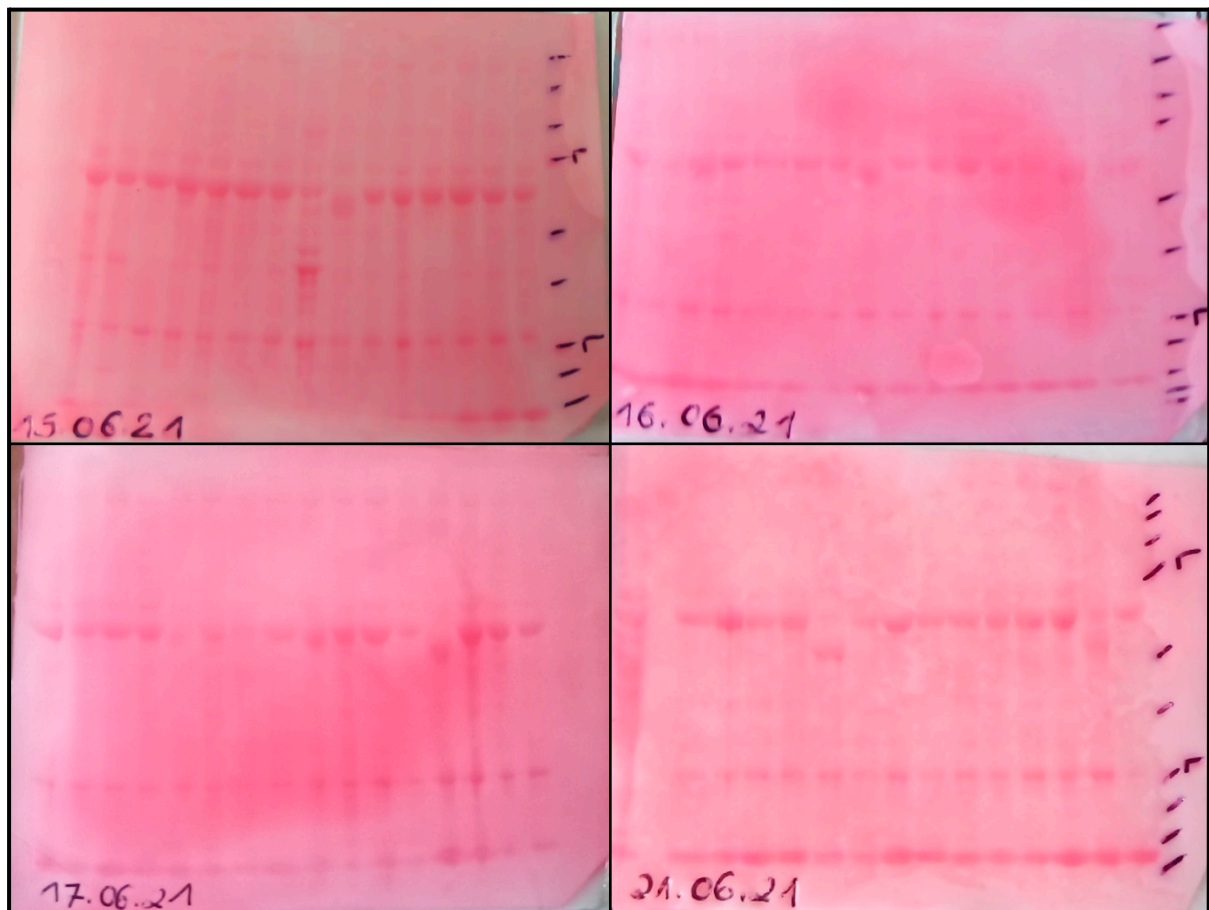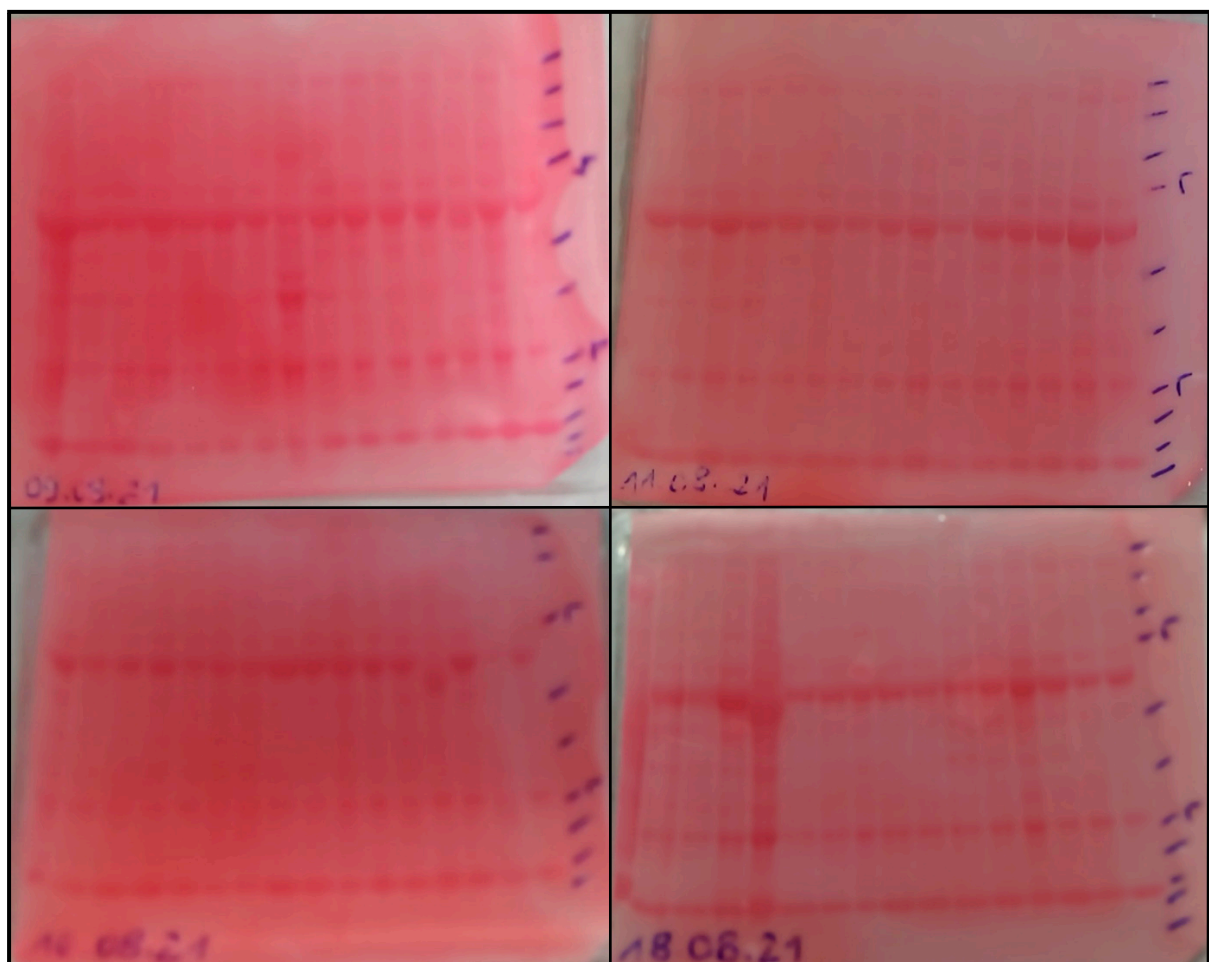

**Figure S2**

A.-D. Nonparametric correlation of protein level of leptin (abscissa) and percentage adipose tissue mass (ordinate) for male and female controls, and male and female haloperidol medicated SD rats.

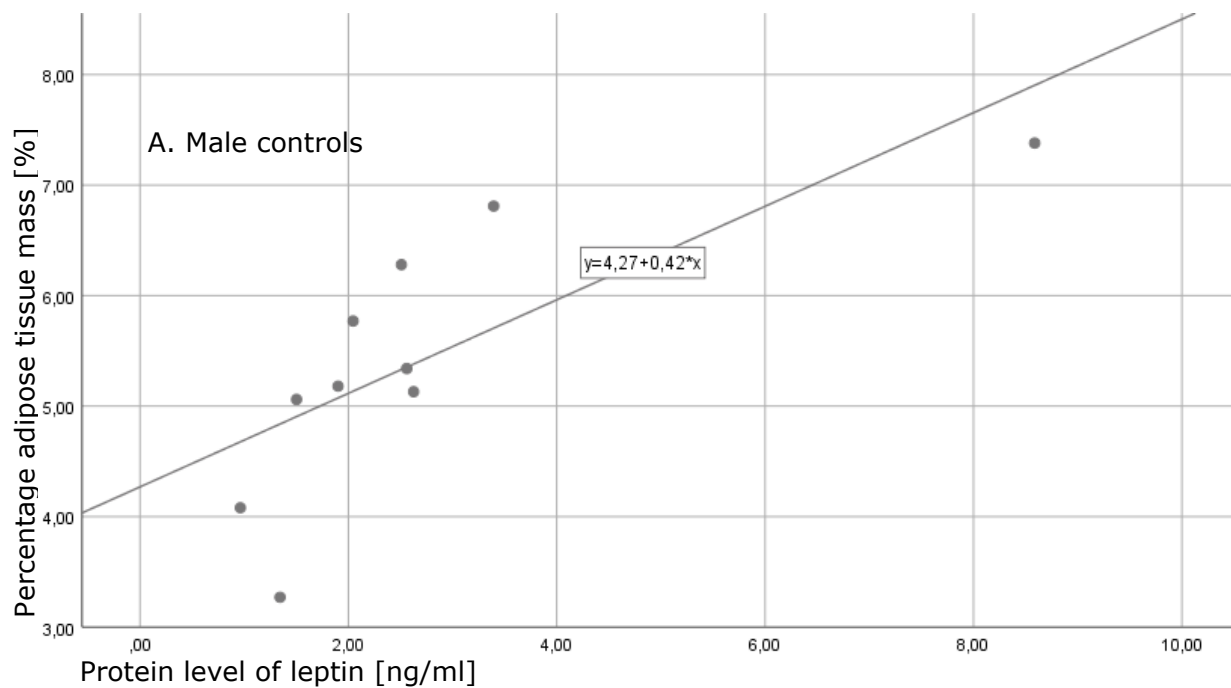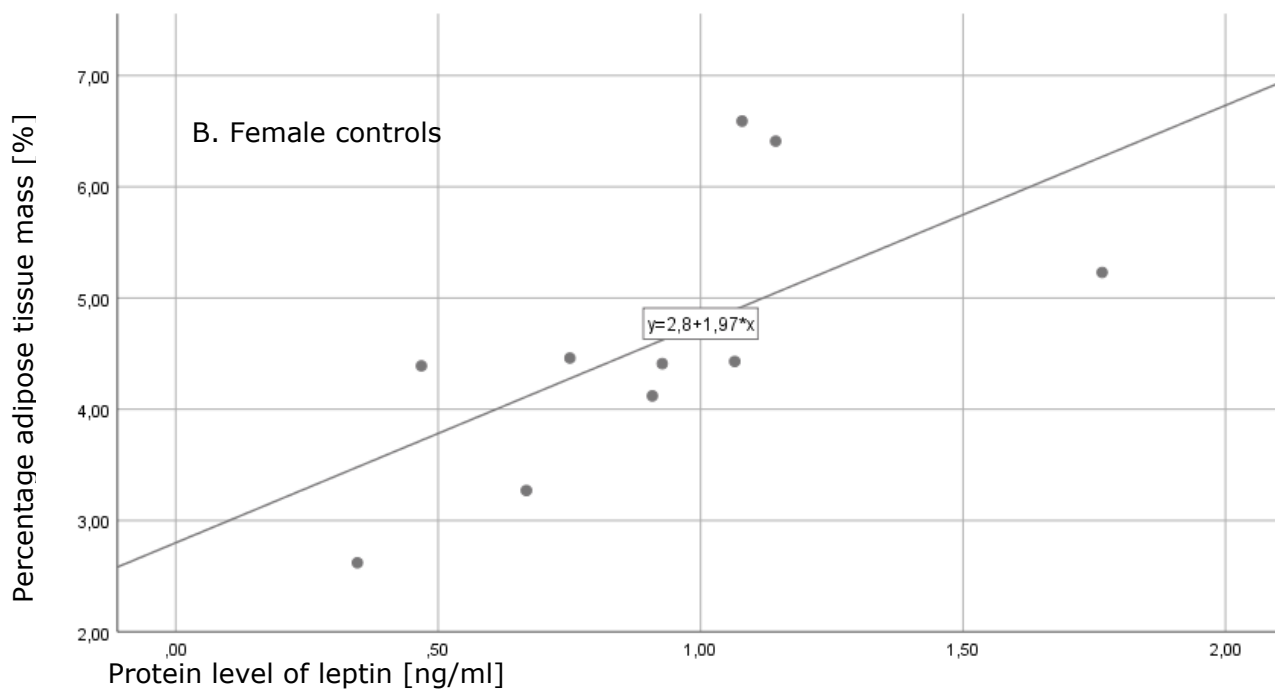

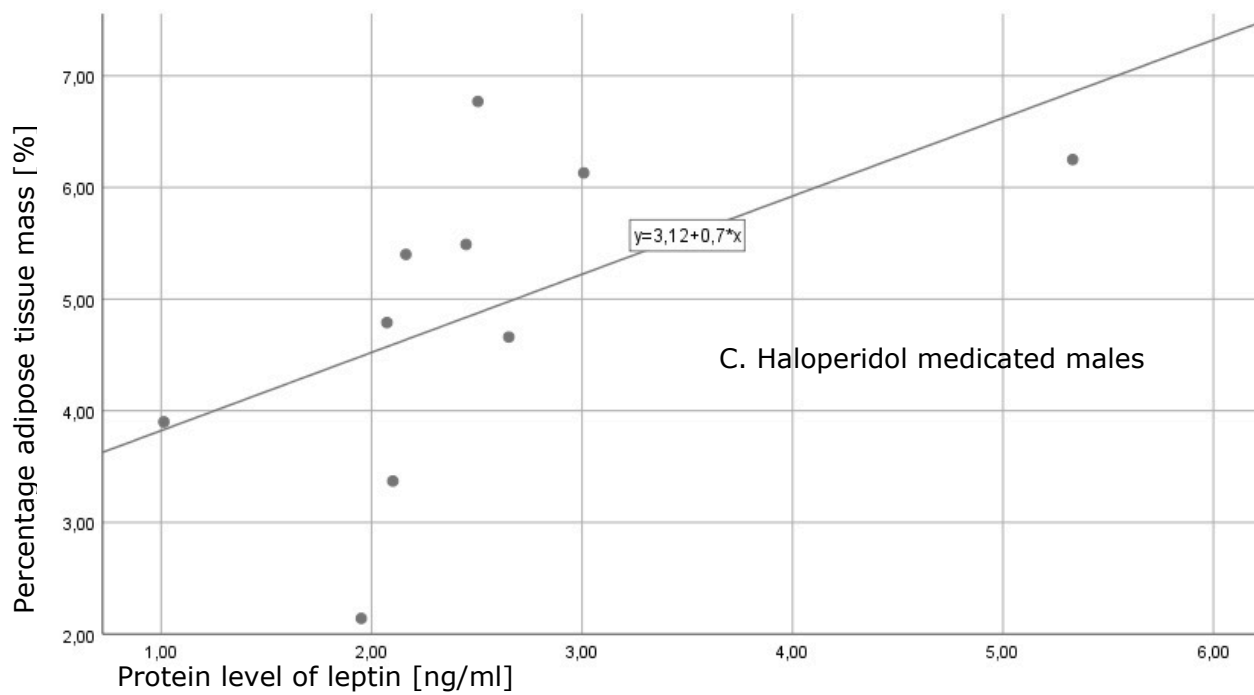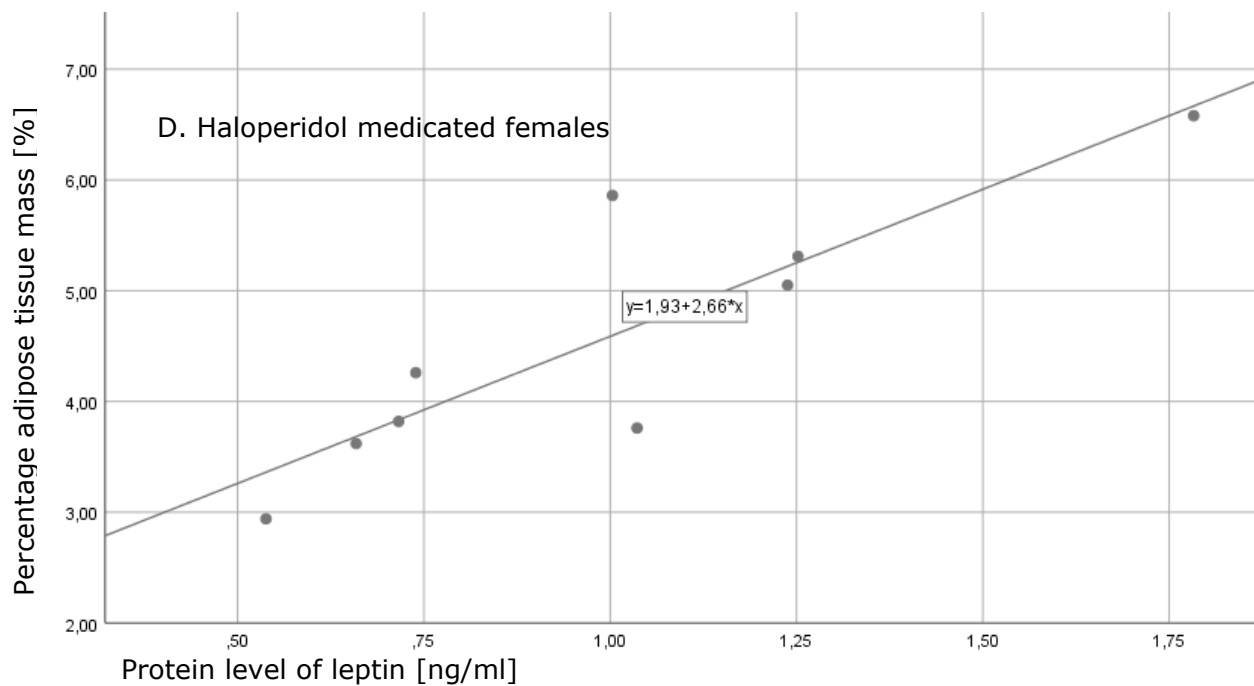

E.-F. Nonparametric correlation of protein level of adiponectin (abscissa) and percentage adipose mass of male and female haloperidol medicated SD rats.

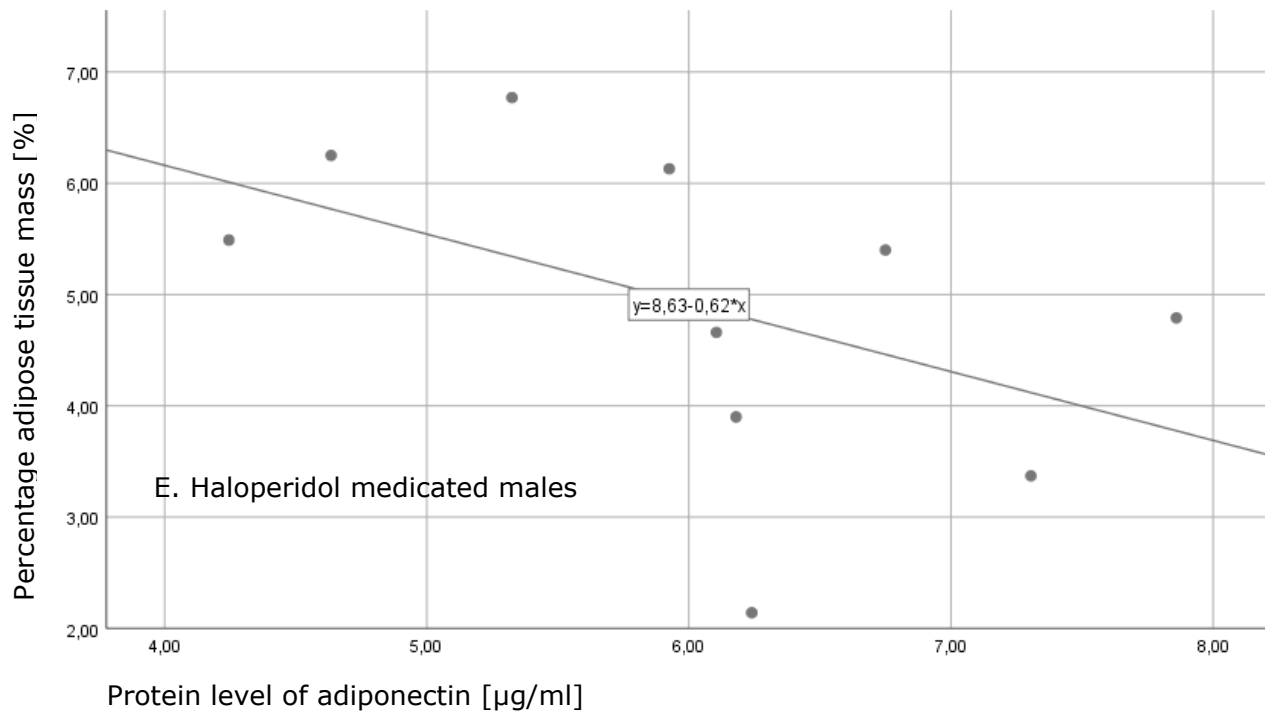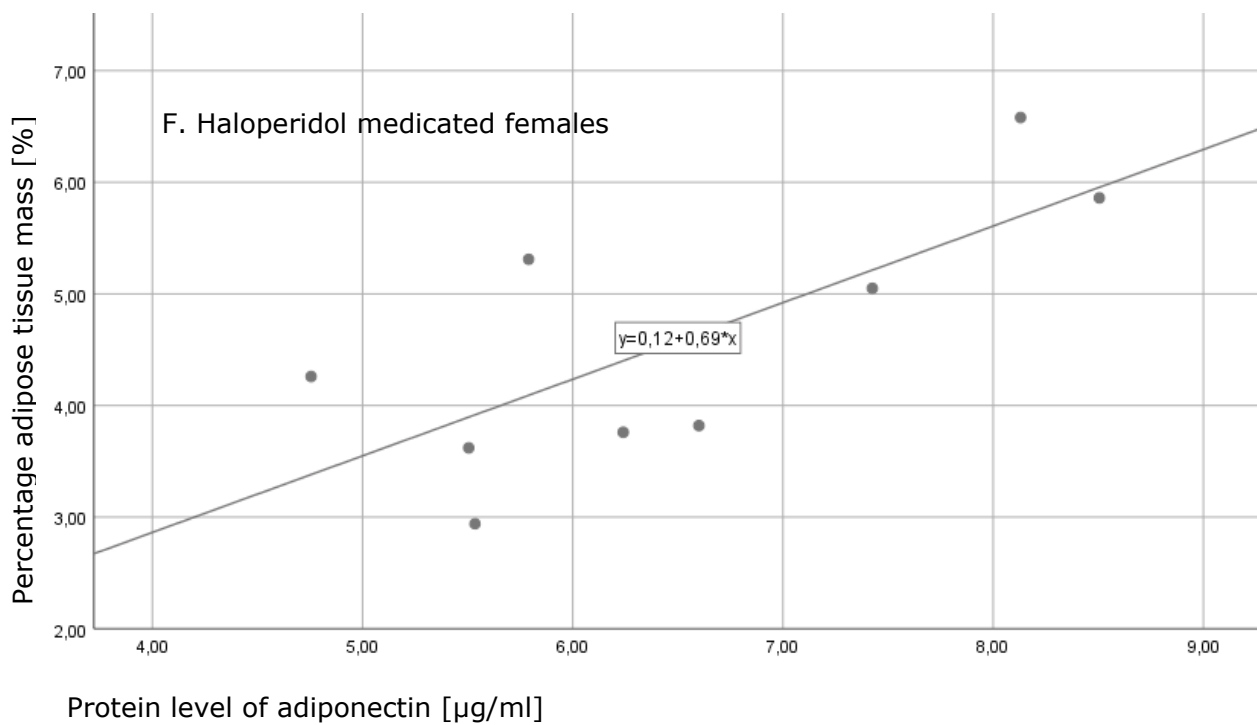



G.-H. Nonparametric correlation of HSL (abscissa) and PerilipinA (ordinate) of male and female control SD rats (HSL=hormon sensitive lipase).

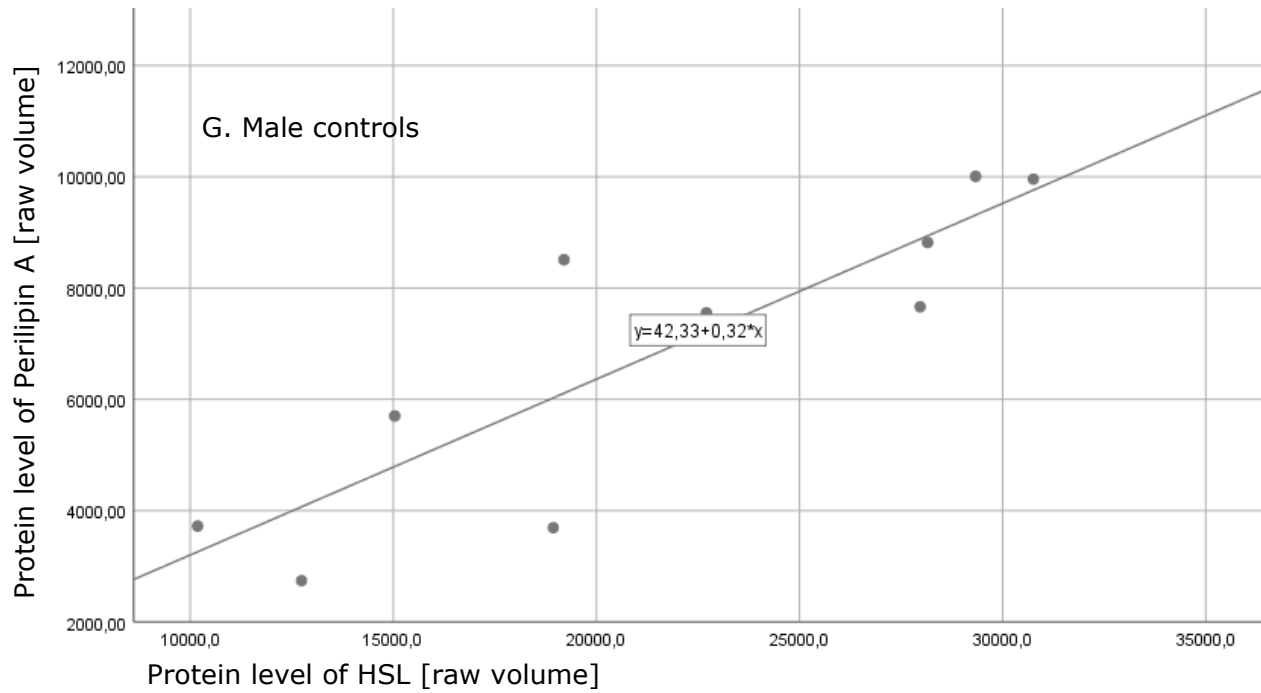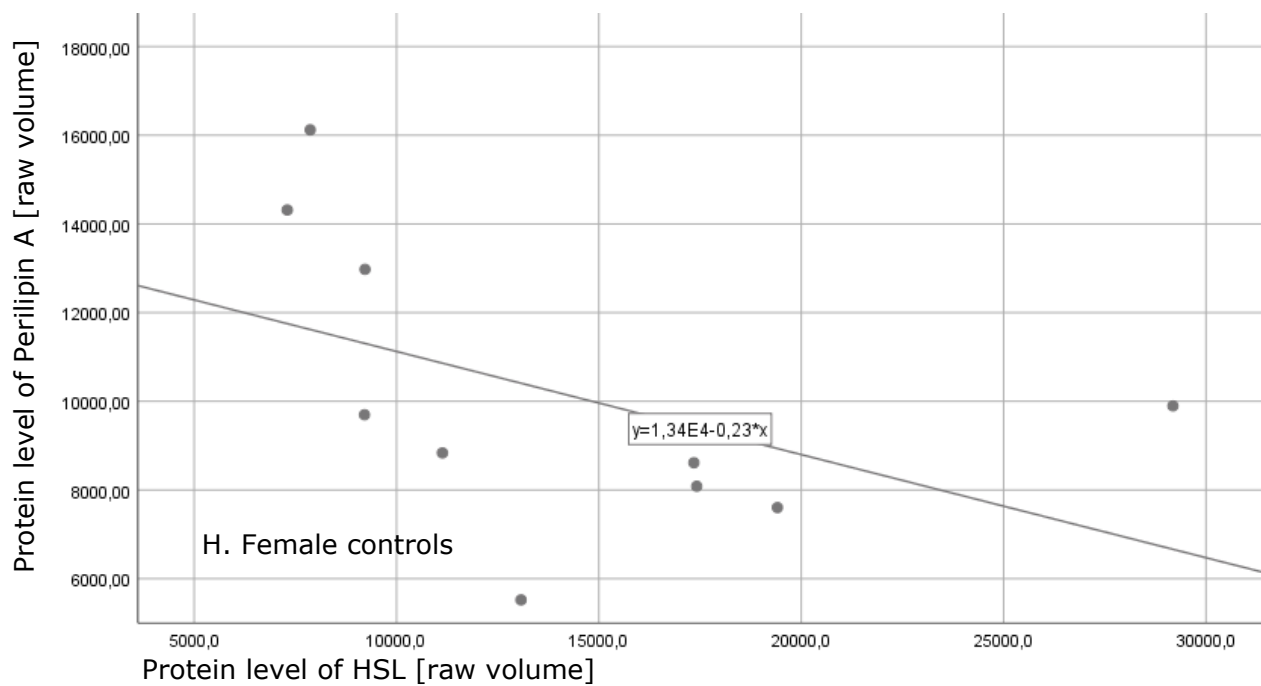

I. Nonparametric correlation of IR-β (abscissa) and Glut-4 (ordinate) of female clozapine medicated SD rats (IR-β= insulin receptor-β; Glut-4= glucose transporter-4).

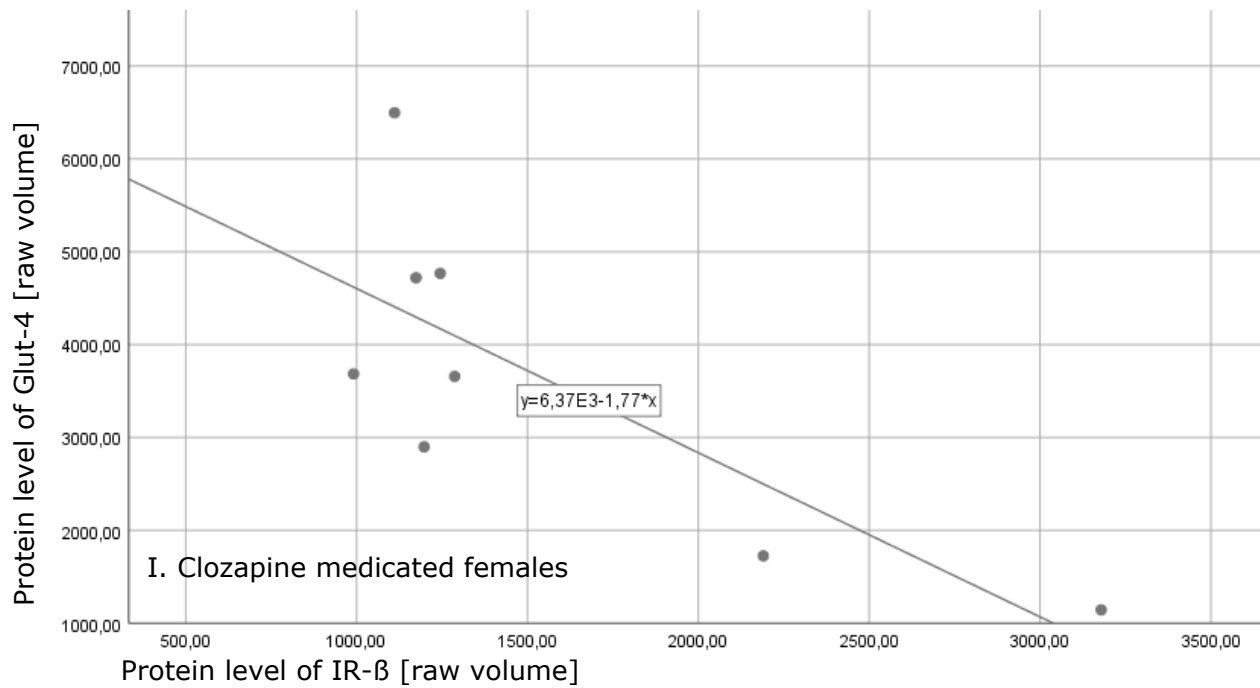



**Figure S3**

A. Final body weight (body weight gain over 12-weeks was shown in [23])

B Final body weight minus liver mass (liver mass was examined in [24])

C Final body mass minus adipocyte mass

D Final body weight minus liver and adipocyte mass

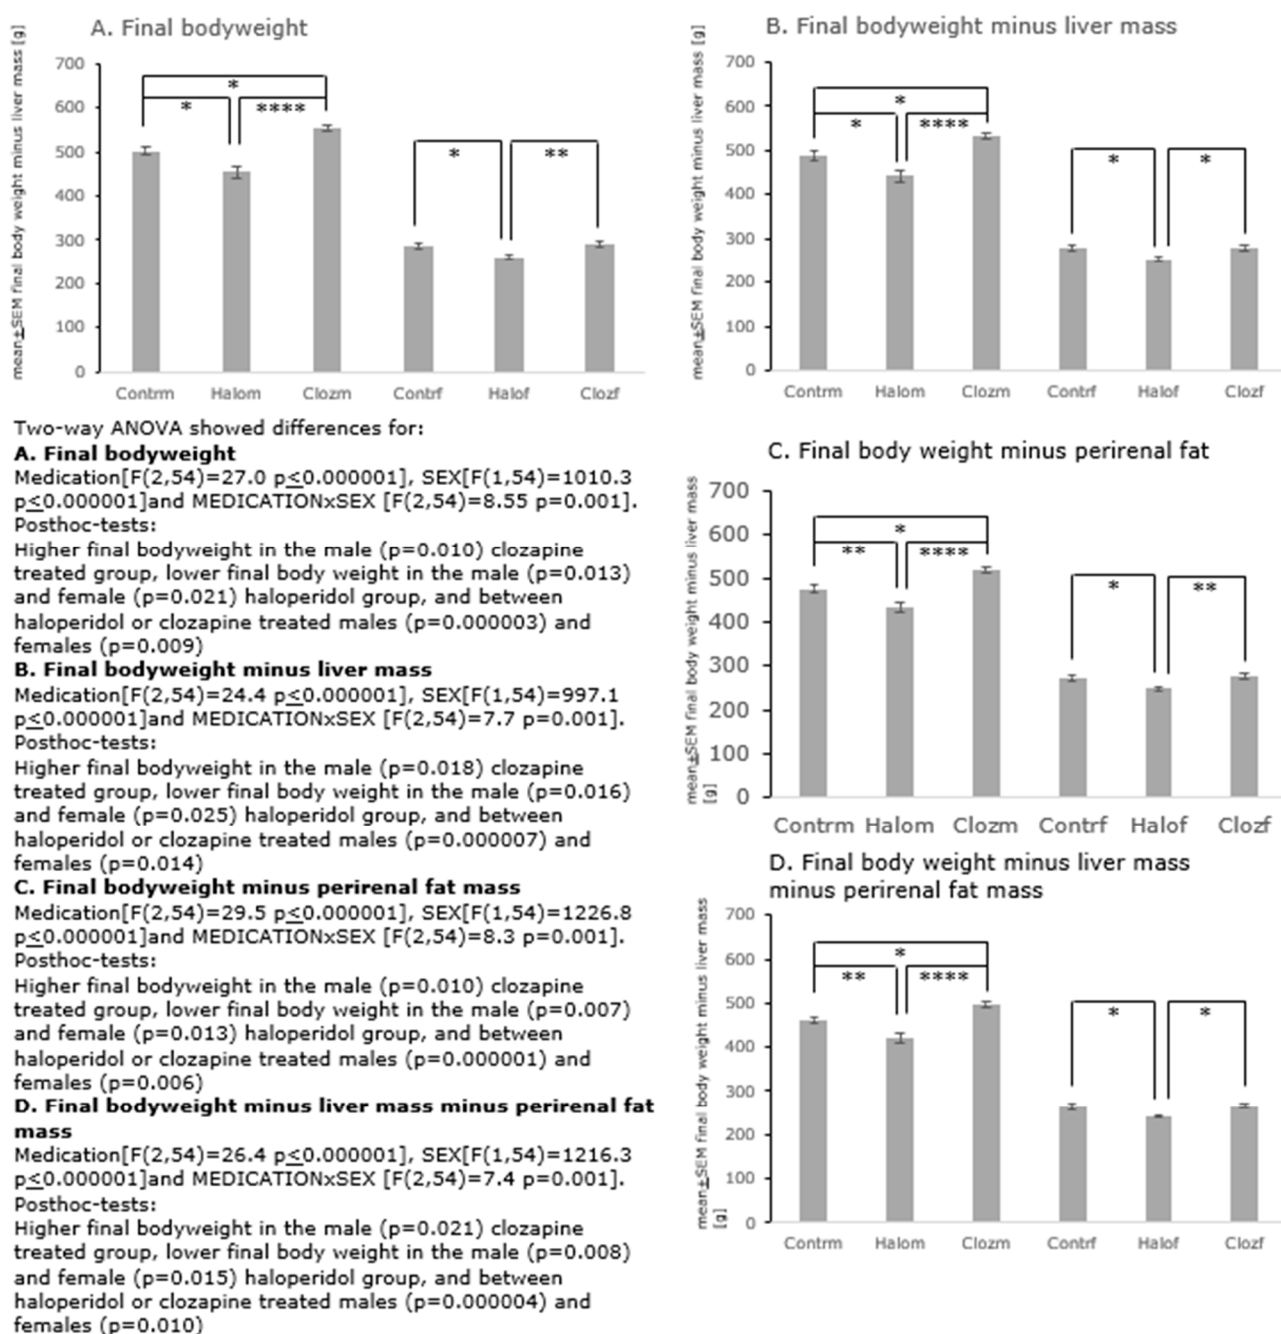

\*  $p \leq 0.05$ ; \*\*  $p \leq 0.01$  \*\*\*\*  $p \leq 0.00001$
